# Supplementary material for: Auditory sensory deprivation induced by noise exposure exacerbates cognitive decline in a mouse model of Alzheimer’s disease
Source: eLife. 2021 Oct 26;10:e70908. doi: 10.7554/eLife.70908 (PMC8547960; doi:10.7554/eLife.70908)
Supplement: Figure 2—source data 1. [file elife-70908-fig2-data1.xlsx]

## Sheet: AD
	AD-NN 3 M	6 kHz	12 kHz	16 kHz	20 kHz	24 kHz	32 kHz
	mouse 1	35	20	20	20	30	35
	mouse 2	50	45	45	40	40	40
	mouse 3	50	45	40	45	45	40
	mouse 4	45	25	25	25	20	25
	mouse 5	55	40	30	40	40	45
	mouse 6	35	20	20	20	30	35
	mouse 7	45	35	30	25	20	25
	mouse 8	35	25	20	20	25	20
	mouse 9	35	25	20	25	35	35
	mouse 10	55	40	50	40	50	40
	mouse 11	55	45	40	35	35	35
	mouse 12	35	25	20	20	20	20
	Average	44.1667	32.5	30	29.5833	32.5	32.9167
	SD	8.74729	10.113	11.0782	9.64326	10.113	8.38243
	SEM	2.52513	2.91937	3.19801	2.78377	2.91937	2.4198
	AD-NE 3 M	6 kHz	12 kHz	16 kHz	20 kHz	24 kHz	32 kHz
	mouse 1	55	60	55	45	55	60
	mouse 2	65	55	60	70	65	70
	mouse 3	70	40	60	70	65	70
	mouse 4	70	60	70	60	65	70
	mouse 5	65	40	50	40	65	65
	mouse 6	70	45	45	40	40	45
	mouse 7	45	45	60	55	40	35
	Average	62.8571	49.2857	57.1429	54.2857	56.4286	59.2857
	SD	9.5119	8.86405	8.09174	13.0475	11.8019	13.9728
	SEM	3.59516	3.3503	3.05839	4.9315	4.46071	5.28121
	AD-NN 6 M	6 kHz	12 kHz	16 kHz	20 kHz	24 kHz	32 kHz
	mouse 1	55	25	50	50	50	40
	mouse 2	80	50	50	55	45	65
	mouse 3	50	50	75	65	60	60
	mouse 4	50	40	70	70	65	70
	mouse 5	50	45	25	25	30	30
	mouse 6	50	45	20	30	30	30
	mouse 7	50	45	25	25	30	30
	mouse 8	60	50	50	50	45	50
	mouse 9	50	35	30	40	30	35
	mouse 10	65	55	50	45	50	55
	mouse 11	60	45	40	30	35	45
	mouse 12	60	50	65	70	65	70
	mouse 13	70	40	60	55	55	65
	Average	57.6923	44.2308	46.9231	46.9231	45.3846	49.6154
	SD	9.49021	7.86505	17.9743	16.1424	13.457	15.6074
	SEM	2.63211	2.18137	4.98519	4.47709	3.73229	4.3287
	AD-NE 6 M	6 kHz	12 kHz	16 kHz	20 kHz	24 kHz	32 kHz
	mouse 1	55	70	65	60	50	55
	mouse 2	65	50	55	60	60	65
	mouse 3	50	55	60	65	65	65
	mouse 4	55	65	60	55	55	60
	mouse 5	45	55	60	60	60	60
	mouse 6	50	70	70	60	60	65
	mouse 7	80	65	65	70	70	75
	mouse 8	65	80	45	60	65	60
	mouse 9	80	60	55	45	50	55
	mouse 10	50	70	65	65	65	55
	mouse 11	50	70	70	65	70	70
	Average	58.6364	64.5455	60.9091	60.4545	60.9091	62.2727
	SD	12.266	8.79049	7.35465	6.50175	7.00649	6.4667
	SEM	3.69834	2.65043	2.21751	1.96035	2.11254	1.94978

## Sheet: WT
	WT-NN 3 M	6 kHz	12 kHz	16 kHz	20 kHz	24 kHz	32 kHz
	mouse 1	40	30	25	20	20	20
	mouse 2	40	15	15	15	20	25
	mouse 3	40	15	15	15	15	20
	mouse 4	60	40	50	50	50	50
	mouse 5	35	15	15	15	15	20
	mouse 6	45	25	20	20	25	40
	mouse 7	50	25	20	45	55	70
	mouse 8	55	35	40	50	60	65
	mouse 9	35	25	15	20	20	20
	mouse 10	45	20	15	15	15	30
	mouse 11	45	15	15	20	20	35
	Average	44.5455	23.6364	22.2727	25.9091	28.6364	35.9091
	SD	7.89131	8.68646	11.9087	14.6318	17.3336	18.4144
	SEM	2.37932	2.61907	3.59062	4.41167	5.22628	5.55216
	WT-NE 3 M	6 kHz	12 kHz	16 kHz	20 kHz	24 kHz	32 kHz
	mouse 1	40	65	60	60	70	60
	mouse 2	50	65	70	70	60	50
	mouse 3	85	65	65	70	70	75
	mouse 4	70	70	65	60	60	75
	mouse 5	55	70	60	65	65	70
	mouse 6	65	70	70	70	75	70
	mouse 7	55	75	65	45	50	40
	mouse 8	60	40	40	65	75	70
	mouse 9	55	85	75	75	80	75
	Average	59.4444	67.2222	63.3333	64.4444	67.2222	65
	SD	12.856	12.0185	10	8.81917	9.39119	12.5
	SEM	4.28535	4.00617	3.33333	2.93972	3.1304	4.16667
	WT-NN 6 M	6 kHz	12 kHz	16 kHz	20 kHz	24 kHz	32 kHz
	mouse 1	55	45	65	90	90	95
	mouse 2	80	55	35	45	40	80
	mouse 3	45	25	30	55	80	90
	mouse 4	65	45	35	45	40	80
	mouse 5	55	35	35	40	45	35
	mouse 6	50	45	35	30	40	55
	mouse 7	85	50	45	35	70	90
	mouse 8	55	25	20	25	30	45
	mouse 9	75	25	45	40	50	40
	Average	62.7778	38.8889	38.3333	45	53.8889	67.7778
	SD	14.1667	11.6667	12.5	19.0394	20.8833	23.863
	SEM	4.72222	3.88889	4.16667	6.34648	6.96109	7.95435
	WT-NE 6 M	6 kHz	12 kHz	16 kHz	20 kHz	24 kHz	32 kHz
	mouse 1	60	85	80	80	80	85
	mouse 2	80	70	80	90	90	90
	mouse 3	65	75	65	55	70	70
	mouse 4	65	60	40	35	80	80
	mouse 5	55	35	50	60	40	90
	mouse 6	65	45	60	65	65	65
	mouse 7	70	80	75	70	70	75
	Average	65.7143	64.2857	64.2857	65	70.7143	79.2857
	SD	7.86796	18.5806	15.3917	17.7951	15.9239	9.759
	SEM	2.97381	7.0228	5.81752	6.72593	6.01868	3.68856
