# Supplementary material for: Auditory sensory deprivation induced by noise exposure exacerbates cognitive decline in a mouse model of Alzheimer’s disease
Source: eLife. 2021 Oct 26;10:e70908. doi: 10.7554/eLife.70908 (PMC8547960; doi:10.7554/eLife.70908)
Supplement: Figure 3—source data 1. [file elife-70908-fig3-data1.xlsx]

## Sheet: I_O 3M
I/O slope
		Group	Mice	Recording	20	50	100	150	200	250	300	(uA)
		AD-NN 3M	1	1	-0.050083	-0.151885	-0.563452	-0.867759	-1.20535	-1.33797	-1.55361
		AD-NN 3M	2	1	-0.119912	-1.00232	-1.36146	-1.41618	-1.4178	-1.57458	-1.57308
		AD-NN 3M	2	2	-0.0795947	-0.434023	-0.747642	-0.944253	-1.35909	-1.40325	-1.43787
		AD-NN 3M	2	3	-0.0608887	-0.497578	-1.17362	-1.44122	-1.25024	-1.31938	-1.5336
		AD-NN 3M	2	4	-0.0444043	-0.463457	-0.732686	-1.14033	-1.11775	-1.25191	-1.34011
		AD-NN 3M	2	5	-0.065835	-0.404019	-0.901655	-1.176	-1.41442	-1.48642	-1.63306
		AD-NN 3M	2	6	-0.0668262	-0.272456	-0.471978	-0.829653	-0.901108	-0.998208	-1.19507
		AD-NN 3M	3	1	-0.234588	-0.820172	-1.30302	-1.36701	-1.54544	-1.54893	-1.50479
		AD-NN 3M	3	2	-0.156082	-0.914783	-1.85544	-2.11722	-2.32252	-2.42652	-2.67674
		AD-NN 3M	4	1	-0.082002	-0.500386	-0.990239	-1.16542	-1.60009	-1.77606	-1.62436
		AD-NN 3M	4	2	-0.0173975	-0.591962	-1.61047	-1.995	-2.12178	-2.32188	-2.52974
		AD-NN 3M	5	1	-0.0953827	-0.280665	-0.963465	-1.28969	-1.65812	-1.91121	-2.00245
		AD-NN 3M	5	2	-0.0286535	-0.362032	-0.915054	-1.06139	-1.28376	-1.33877	-1.61335
		AD-NN 3M	5	3	-0.144741	-0.28107	-0.586097	-0.81009	-1.1649	-1.39593	-1.52308
		AD-NN 3M	6	1	-0.143592	-0.251866	-0.716245	-1.3747	-1.5845	-1.81003	-2.32097
		Group	Mice	Recording	20	50	100	150	200	250	300	(uA)
		AD-NE 3M	1	1	-0.129552	-0.409749	-0.660787	-0.584218	-0.663361	-0.680796	-0.791651
		AD-NE 3M	1	2	-0.030543	-0.386246	-0.496073	-0.593572	-0.672109	-0.857112	-0.880117
		AD-NE 3M	1	3	-0.0456238	-0.150543	-0.362132	-0.489176	-0.670909	-0.756999	-0.729304
		AD-NE 3M	2	1	-0.0150808	-0.101257	-0.266073	-0.409668	-0.45992	-0.556269	-0.637573
		AD-NE 3M	2	2	-0.0494893	-0.0974935	-0.248708	-0.307673	-0.394541	-0.434489	-0.443878
		AD-NE 3M	3	1	-0.160656	-0.566555	-1.05733	-1.37362	-1.50977	-1.74134	-1.78041
		AD-NE 3M	3	2	-0.0446057	-0.343338	-0.890038	-0.948661	-1.0288	-1.09488	-1.3178
		AD-NE 3M	4	1	-0.0300923	-0.584607	-0.998555	-1.2732	-1.52458	-1.52896	-1.5899
		AD-NE 3M	4	2	-0.124472	-0.258219	-0.540646	-0.635681	-0.727299	-0.790065	-0.890898
		AD-NE 3M	4	3	-0.0370331	-0.268931	-0.360677	-0.465342	-0.430857	-0.450053	-0.554331
		AD-NE 3M	5	1	-0.0347341	-0.29955	-1.01757	-1.27227	-1.37759	-1.46457	-1.74309
		AD-NE 3M	5	2	-0.0121663	-0.26506	-0.818314	-0.930847	-1.18631	-1.33095	-1.29035
		AD-NE 3M	5	3	-0.0275814	-0.121533	-0.33967	-0.545656	-0.601408	-0.645005	-0.643579
		Group	Mice	Recording	20	50	100	150	200	250	300	(uA)
		WT-NN 3M	1	1	-0.343592	-0.760247	-0.825949	-0.907629	-0.953764	-1.01875	-0.95897
		WT-NN 3M	1	2	-0.18867	-0.511259	-0.900269	-1.24171	-1.34421	-1.31908	-1.48674
		WT-NN 3M	1	3	-0.302842	-0.691492	-1.2076	-1.50506	-1.78671	-1.73681	-1.83016
		WT-NN 3M	2	1	-0.163184	-0.388965	-0.602441	-0.767334	-0.908691	-1.00635	-1.26675
		WT-NN 3M	2	2	-0.0627441	-0.484082	-0.785937	-0.955811	-1.01919	-0.952637	-1.13125
		WT-NN 3M	3	1	-0.168706	-0.33196	-0.609344	-0.669135	-0.746881	-0.841456	-0.895024
		WT-NN 3M	3	2	-0.133632	-0.510172	-0.777025	-0.936361	-1.01712	-1.16383	-1.35703
		WT-NN 3M	3	3	-0.131578	-0.409346	-0.762411	-0.918286	-1.16777	-1.00978	-1.07052
		WT-NN 3M	4	1	-0.137111	-0.370934	-0.831459	-1.0599	-1.16221	-1.4982	-1.5904
		WT-NN 3M	4	2	-0.107247	-0.45028	-0.970023	-1.5035	-1.58088	-1.78906	-2.02855
		WT-NN 3M	5	1	-0.0598329	-0.399688	-0.670369	-0.988585	-1.08754	-1.18325	-1.19694
		Group	Mice	Recording	20	50	100	150	200	250	300	(uA)
		WT-NE 3M	1	1	-0.0070477	-0.155756	-0.226577	-0.441205	-0.560382	-0.668233	-0.593419
		WT-NE 3M	1	2	-0.0835723	-0.199225	-0.224579	-0.256504	-0.41292	-0.483466	-0.525407
		WT-NE 3M	1	3	-0.0736505	-0.255451	-0.422244	-0.646424	-0.747387	-0.888069	-0.97047
		WT-NE 3M	1	4	-0.0904825	-0.272035	-0.398048	-0.524154	-0.564432	-0.620252	-0.766643
		WT-NE 3M	2	1	-0.150131	-0.450589	-0.563833	-0.603038	-0.769581	-0.811474	-0.919509
		WT-NE 3M	2	2	-0.164584	-0.357102	-0.465193	-0.500754	-0.555062	-0.612229	-0.666996
		WT-NE 3M	2	3	-0.0567987	-0.176665	-0.350787	-0.499579	-0.908358	-0.961381	-1.02327
		WT-NE 3M	2	4	-0.122431	-0.268895	-0.306912	-0.492716	-0.584258	-0.572118	-0.665932
		WT-NE 3M	2	5	-0.0286402	-0.181068	-0.352472	-0.717737	-0.737861	-0.786941	-0.67
		WT-NE 3M	2	6	-0.104105	-0.268341	-0.356342	-0.487006	-0.60484	-0.672337	-0.694104
		WT-NE 3M	3	1	-0.098547	-0.244132	-0.340898	-0.387614	-0.514865	-0.538619	-0.597889
		WT-NE 3M	3	2	-0.119571	-0.27651	-0.421167	-0.491395	-0.505458	-0.616583	-0.667457
		WT-NE 3M	3	3	-0.132648	-0.283207	-0.453932	-0.530441	-0.577603	-0.599258	-0.592581
		WT-NE 3M	3	4	-0.136603	-0.284325	-0.537592	-0.602673	-0.651554	-0.691565	-0.692341
		WT-NE 3M	3	5	-0.110115	-0.371387	-0.541151	-0.601864	-0.625582	-0.593369	-0.631124
		WT-NE 3M	3	6	-0.121934	-0.326728	-0.47574	-0.513194	-0.565214	-0.612125	-0.620492
		WT-NE 3M	3	7	-0.155285	-0.361992	-0.496806	-0.604083	-0.616834	-0.653604	-0.694576

## Sheet: I_O 6M
I/O amplitude uA 300
Group	Mice	Recording	300	(uA)
WT-NE 6M	1	1	171.02
WT-NE 6M	1	2	98.1956
WT-NE 6M	2	1	165.257
WT-NE 6M	2	2	89.3266
WT-NE 6M	2	3	94.7288
WT-NE 6M	2	4	94.005
WT-NE 6M	3	1	132.452
WT-NE 6M	3	2	82.474
WT-NE 6M	3	3	137.297
WT-NE 6M	3	4	106.469
WT-NE 6M	4	1	74.3289
WT-NE 6M	4	2	75.2841
WT-NE 6M	5	1	97.8673
WT-NE 6M	5	2	140.784
WT-NE 6M	6	1	83.3861
WT-NE 6M	6	2	120.523
WT-NE 6M	7	1	89.8868
WT-NE 6M	8	1	94.0542
WT-NE 6M	8	2	96.0383
WT-NE 6M	8	3	102.65
Group	Mice	Recording	300	(uA)
WT-NN 6M	1	1	111.3
WT-NN 6M	1	2	101.844
WT-NN 6M	1	3	81.6153
WT-NN 6M	1	4	126.923
WT-NN 6M	2	1	58.2126
WT-NN 6M	2	2	104.809
WT-NN 6M	2	3	101.261
WT-NN 6M	2	4	118.908
WT-NN 6M	3	1	106.921
WT-NN 6M	3	2	67.9808
WT-NN 6M	3	3	93.7961
WT-NN 6M	3	4	87.7443
WT-NN 6M	4	1	95.0231
WT-NN 6M	4	2	88.9966
WT-NN 6M	5	1	102.337
WT-NN 6M	5	2	82.7879
WT-NN 6M	6	1	95.7136
WT-NN 6M	6	2	114.736
WT-NN 6M	7	1	134.176
WT-NN 6M	7	2	104.29
WT-NN 6M	7	3	120.624
Group	Mice	Recording	300	(uA)
AD-NN 6M	1	1	109.292
AD-NN 6M	1	2	88.5579
AD-NN 6M	2	1	95.6194
AD-NN 6M	2	2	109.768
AD-NN 6M	2	3	88.7425
AD-NN 6M	2	4	90.3498
AD-NN 6M	3	1	109.453
AD-NN 6M	3	2	111.366
AD-NN 6M	3	3	103.958
AD-NN 6M	4	1	147.627
AD-NN 6M	5	1	70.5201
AD-NN 6M	5	2	74.7461
Group	Mice	Recording	300	(uA)
AD-NE 6M	1	1	79.0606
AD-NE 6M	1	2	72.3209
AD-NE 6M	2	1	87.0354
AD-NE 6M	2	2	53.7267
AD-NE 6M	2	3	101.568
AD-NE 6M	3	1	64.8641
AD-NE 6M	3	2	109.236
AD-NE 6M	3	3	83.4812
AD-NE 6M	3	4	60.6142
AD-NE 6M	3	5	64.1607
AD-NE 6M	3	6	55.0092
AD-NE 6M	4	1	65.6299
AD-NE 6M	4	2	67.1766
AD-NE 6M	5	1	46.1891
