# Supplementary material for: Auditory sensory deprivation induced by noise exposure exacerbates cognitive decline in a mouse model of Alzheimer’s disease
Source: eLife. 2021 Oct 26;10:e70908. doi: 10.7554/eLife.70908 (PMC8547960; doi:10.7554/eLife.70908)
Supplement: Figure 4—source data 1. [file elife-70908-fig4-data1.xlsx]

## Sheet: Foglio1
Group	Mice	Neuron	Dendrite	N of spines/1 um
WT-NN	1	1	apical	2.02469
WT-NN	1	2	apical	1.77924
WT-NN	1	3	apical	2.24412
WT-NN	1	4	apical	2.15241
WT-NN	1	5	apical	1.68622
WT-NN	1	6	apical	2.00143
WT-NN	1	7	apical	1.69602
WT-NN	1	8	apical	1.56658
WT-NN	1	9	apical	1.64725
WT-NN	1	10	apical	1.6074
WT-NN	2	1	apical	1.97895
WT-NN	2	2	apical	1.90609
WT-NN	2	3	apical	1.98135
WT-NN	2	4	apical	1.54536
WT-NN	2	5	apical	1.79462
WT-NN	2	6	apical	1.44566
WT-NN	2	7	apical	1.69492
WT-NN	2	8	apical	1.54536
WT-NN	2	9	apical	1.39581
WT-NN	2	10	apical	1.79462
WT-NN	3	1	apical	1.54536
WT-NN	3	2	apical	1.49551
WT-NN	3	3	apical	1.09671
WT-NN	3	4	apical	0.947159
WT-NN	3	5	apical	1.36253
WT-NN	3	6	apical	0.716846
WT-NN	3	7	apical	0.547345
WT-NN	3	8	apical	1.13314
WT-NN	3	9	apical	1.18598
WT-NN	3	10	apical	0.925069
WT-NN	4	1	apical	1.03245
WT-NN	4	2	apical	1.09212
WT-NN	4	3	apical	1.1956
WT-NN	4	4	apical	1.42296
WT-NN	4	5	apical	1.59125
WT-NN	4	6	apical	2.21901
WT-NN	4	7	apical	0.783771
WT-NN	4	8	apical	0.875486
WT-NN	4	9	apical	1.10865
WT-NN	4	10	apical	1.48116
WT-NN	1	1	basal	1.78245
WT-NN	1	2	basal	1.85634
WT-NN	1	3	basal	2.12766
WT-NN	1	4	basal	1.8018
WT-NN	1	5	basal	1.11562
WT-NN	1	6	basal	1.1544
WT-NN	1	7	basal	1.14772
WT-NN	2	1	basal	0.864327
WT-NN	2	2	basal	1.13493
WT-NN	2	3	basal	0.933908
WT-NN	2	4	basal	1.77051
WT-NN	2	5	basal	2.05386
WT-NN	2	6	basal	1.76693
WT-NN	3	1	basal	2.7532
WT-NN	3	2	basal	2.46865
WT-NN	3	3	basal	2.06001
WT-NN	3	4	basal	2.38508
WT-NN	3	5	basal	2.30956
WT-NN	3	6	basal	1.19095
WT-NN	3	7	basal	1.29611
WT-NN	3	8	basal	1.39581
WT-NN	3	9	basal	1.34596
WT-NN	3	10	basal	1.04686
WT-NN	4	1	basal	1.54536
WT-NN	4	2	basal	1.16749
WT-NN	4	3	basal	1.56904
WT-NN	4	4	basal	1.23885
WT-NN	4	5	basal	1.40914
WT-NN	4	6	basal	0.746269
WT-NN	4	7	basal	0.711913
Group	Mice	Neuron	Dendrite	N of spines/1 um
WT-NE	1	1	apical	1.04686
WT-NE	1	2	apical	1.29611
WT-NE	1	3	apical	1.29611
WT-NE	1	4	apical	1.29611
WT-NE	1	5	apical	1.14656
WT-NE	1	6	apical	1.59521
WT-NE	1	7	apical	1.29611
WT-NE	2	1	apical	1.99402
WT-NE	2	2	apical	0.947159
WT-NE	2	3	apical	1.98864
WT-NE	2	4	apical	1.73469
WT-NE	2	5	apical	1.63399
WT-NE	2	6	apical	1.5661
WT-NE	2	7	apical	1.04368
WT-NE	2	8	apical	1.19507
WT-NE	3	1	apical	1.31789
WT-NE	3	2	apical	1.83946
WT-NE	3	3	apical	1.4884
WT-NE	3	4	apical	1.38047
WT-NE	3	5	apical	1.38318
WT-NE	3	6	apical	1.37268
WT-NE	3	7	apical	1.19534
WT-NE	3	8	apical	1.58255
WT-NE	3	9	apical	1.60529
WT-NE	4	1	apical	1.72276
WT-NE	4	2	apical	1.207
WT-NE	4	3	apical	1.12259
WT-NE	4	4	apical	1.23806
WT-NE	4	5	apical	1.65975
WT-NE	4	6	apical	1.13074
WT-NE	1	1	basal	1.70266
WT-NE	1	2	basal	1.43223
WT-NE	1	3	basal	1.54536
WT-NE	1	4	basal	1.69492
WT-NE	1	5	basal	0.897308
WT-NE	1	6	basal	1.39581
WT-NE	1	7	basal	1.59521
WT-NE	2	1	basal	1.24626
WT-NE	2	2	basal	1.24626
WT-NE	2	3	basal	1.39581
WT-NE	2	4	basal	1.49551
WT-NE	2	5	basal	1.51829
WT-NE	2	6	basal	1.69252
WT-NE	2	7	basal	1.65165
WT-NE	2	8	basal	1.52149
WT-NE	3	1	basal	1.43885
WT-NE	3	2	basal	1.32427
WT-NE	3	3	basal	1.51384
WT-NE	3	4	basal	1.428
WT-NE	3	5	basal	1.54389
WT-NE	3	6	basal	1.41304
WT-NE	3	7	basal	1.53005
WT-NE	3	8	basal	2.01373
WT-NE	3	9	basal	1.5625
WT-NE	4	1	basal	1.45833
WT-NE	4	2	basal	1.77028
WT-NE	4	3	basal	1.37322
WT-NE	4	4	basal	0.98472
WT-NE	4	5	basal	0.947653
WT-NE	4	6	basal	1.10675
Group	Mice	Neuron	Dendrite	N of spines/1 um
AD-NN	1	1	apical	1.29145
AD-NN	1	2	apical	1.11607
AD-NN	1	3	apical	0.958827
AD-NN	1	4	apical	1.14041
AD-NN	1	5	apical	1.44684
AD-NN	1	6	apical	1.25984
AD-NN	1	7	apical	0.945254
AD-NN	1	8	apical	1.23093
AD-NN	1	9	apical	0.849702
AD-NN	1	10	apical	1.39567
AD-NN	2	1	apical	2.34192
AD-NN	2	2	apical	1.44684
AD-NN	2	3	apical	1.23093
AD-NN	2	4	apical	2.34192
AD-NN	2	5	apical	2.16667
AD-NN	2	6	apical	2.52101
AD-NN	2	7	apical	1.92813
AD-NN	2	8	apical	1.80251
AD-NN	2	9	apical	2.28125
AD-NN	3	1	apical	2.34192
AD-NN	3	2	apical	2.16667
AD-NN	3	3	apical	2.52101
AD-NN	3	4	apical	1.92813
AD-NN	3	5	apical	1.80251
AD-NN	3	6	apical	2.28125
AD-NN	3	7	apical	1.31161
AD-NN	3	8	apical	1.43141
AD-NN	4	1	apical	1.47882
AD-NN	4	2	apical	1.47352
AD-NN	4	3	apical	1.85697
AD-NN	4	4	apical	1.5544
AD-NN	4	5	apical	1.50812
AD-NN	4	6	apical	1.66998
AD-NN	4	7	apical	1.11332
AD-NN	4	8	apical	0.976562
AD-NN	4	9	apical	1.66205
AD-NN	1	1	basal	1.12
AD-NN	1	2	basal	0.980008
AD-NN	1	3	basal	1.4195
AD-NN	1	4	basal	1.18911
AD-NN	1	5	basal	1.59151
AD-NN	1	6	basal	0.923077
AD-NN	1	7	basal	1.27949
AD-NN	1	8	basal	1.79325
AD-NN	1	9	basal	0.979624
AD-NN	1	10	basal	1.45615
AD-NN	2	1	basal	1.85585
AD-NN	2	2	basal	1.90409
AD-NN	2	3	basal	1.95408
AD-NN	2	4	basal	1.59817
AD-NN	2	5	basal	1.92686
AD-NN	2	6	basal	1.45615
AD-NN	2	7	basal	1.85585
AD-NN	2	8	basal	1.90409
AD-NN	2	9	basal	1.95408
AD-NN	3	1	basal	1.59817
AD-NN	3	2	basal	1.92686
AD-NN	3	3	basal	1.26883
AD-NN	3	4	basal	1.26883
AD-NN	3	5	basal	2.01207
AD-NN	3	6	basal	1.27287
AD-NN	3	7	basal	1.34814
AD-NN	3	8	basal	0.948617
AD-NN	4	1	basal	1.44231
AD-NN	4	2	basal	0.715421
AD-NN	4	3	basal	1.17142
AD-NN	4	4	basal	1.03627
AD-NN	4	5	basal	1.43141
Group	Mice	Neuron	Dendrite	N of spines/1 um
AD-NE	1	1	apical	1.20799
AD-NE	1	2	apical	0.976853
AD-NE	1	3	apical	1.21007
AD-NE	1	4	apical	0.984467
AD-NE	1	5	apical	1.08
AD-NE	1	6	apical	0.831025
AD-NE	1	7	apical	0.870588
AD-NE	1	8	apical	1.11477
AD-NE	1	9	apical	1.20799
AD-NE	1	10	apical	0.976853
AD-NE	2	1	apical	1.21007
AD-NE	2	2	apical	0.984467
AD-NE	2	3	apical	1.08
AD-NE	2	4	apical	1.82791
AD-NE	2	5	apical	1.44483
AD-NE	2	6	apical	1.63997
AD-NE	2	7	apical	1.30764
AD-NE	2	8	apical	1.96497
AD-NE	3	1	apical	1.76619
AD-NE	3	2	apical	1.5088
AD-NE	3	3	apical	1.73024
AD-NE	3	4	apical	1.93906
AD-NE	3	5	apical	1.36347
AD-NE	3	6	apical	1.47937
AD-NE	3	7	apical	1.38662
AD-NE	3	8	apical	1.85449
AD-NE	3	9	apical	1.35135
AD-NE	3	10	apical	1.30988
AD-NE	4	1	apical	1.85551
AD-NE	4	2	apical	1.51455
AD-NE	4	3	apical	1.88
AD-NE	4	4	apical	1.00736
AD-NE	4	5	apical	1.95453
AD-NE	4	6	apical	0.539962
AD-NE	4	7	apical	1.31684
AD-NE	4	8	apical	0.535268
AD-NE	4	9	apical	1.39665
AD-NE	4	10	apical	1.59553
AD-NE	1	1	basal	0.87668
AD-NE	1	2	basal	0.842744
AD-NE	1	3	basal	0.722222
AD-NE	1	4	basal	1.09363
AD-NE	1	5	basal	1.27649
AD-NE	1	6	basal	1.21
AD-NE	1	7	basal	1.37992
AD-NE	1	8	basal	1.26939
AD-NE	1	9	basal	0.87668
AD-NE	1	10	basal	0.842744
AD-NE	2	1	basal	0.722222
AD-NE	2	2	basal	1.09363
AD-NE	2	3	basal	1.27649
AD-NE	2	4	basal	1.43452
AD-NE	2	5	basal	1.83044
AD-NE	2	6	basal	1.2987
AD-NE	2	7	basal	1.46451
AD-NE	2	8	basal	1.61633
AD-NE	3	1	basal	1.69656
AD-NE	3	2	basal	1.32554
AD-NE	3	3	basal	1.82605
AD-NE	3	4	basal	1.62184
AD-NE	3	5	basal	1.20281
AD-NE	3	6	basal	0.948167
AD-NE	3	7	basal	1.47176
AD-NE	3	8	basal	0.915605
AD-NE	3	9	basal	0.834658
AD-NE	3	10	basal	0.957702
AD-NE	4	1	basal	1.21178
AD-NE	4	2	basal	1.5
AD-NE	4	3	basal	1.11779
