# Supplementary material for: Auditory sensory deprivation induced by noise exposure exacerbates cognitive decline in a mouse model of Alzheimer’s disease
Source: eLife. 2021 Oct 26;10:e70908. doi: 10.7554/eLife.70908 (PMC8547960; doi:10.7554/eLife.70908)
Supplement: Figure 5—source data 1. [file elife-70908-fig5-data1.xlsx]

## Sheet: Foglio1
I/O amplitude
	Group	Mice	Recording	20	50	100	150	200	250	300	(uA)
	AD-NN	1	1	-0.223829	-0.497487	-0.76354	-0.926934	-0.997875	-1.06782	-1.15437
	AD-NN	1	2	-0.0745429	-0.187158	-0.310729	-0.412938	-0.477125	-0.525553	-0.592141
	AD-NN	1	3	-0.20802	-0.556471	-0.86675	-1.14506	-1.31761	-0.6	-0.86675
	AD-NN	2	1	-0.10504	-0.241537	-0.463332	-0.518633	-0.776441	-0.785596	-1.10537
	AD-NN	2	2	-0.0490306	-0.241864	-0.521882	-0.877012	-0.882152	-1.00733	-1.15851
	AD-NN	2	3	-0.0415675	-0.167291	-0.553415	-0.696993	-0.723275	-0.795242	-0.970887
	AD-NN	3	1	-0.0324671	-0.216361	-0.486166	-0.71132	-0.910799	-1.09989	-1.29548
	AD-NN	3	2	-0.406577	-0.720221	-1.02204	-1.22036	-1.38649	-1.48234	-1.58199
	AD-NN	3	3	-0.363604	-1.02923	-1.40533	-1.55367	-1.61069	-1.70964	-1.74665
	AD-NN	4	1	-0.0706938	-0.309571	-0.464128	-0.568678	-0.628716	-0.693872	-0.765935
	AD-NN	4	2	-0.310534	-0.568936	-0.728543	-0.808323	-0.875524	-0.90736	-0.935744
	AD-NN	4	3	-0.0917981	-0.489949	-0.817302	-0.983138	-1.15083	-1.24539	-1.29008
	Group	Mice	Recording	20	50	100	150	200	250	300	(uA)
	AD-NE	1	1	-0.0294138	-0.287571	-0.436895	-0.489396	-0.6773	-0.650997	-0.778015
	AD-NE	1	2	-0.193946	-0.302055	-0.750517	-0.901825	-0.993013	-1.1659	-1.2776
	AD-NE	1	3	-0.136313	-0.250421	-0.5388	-0.629782	-0.731229	-0.90063	-1.00522
	AD-NE	1	4	-0.144072	-0.345642	-0.59874	-0.823083	-0.977107	-1.02988	-1.07348
	AD-NE	2	1	-0.107775	-0.133997	-0.238303	-0.367776	-0.482935	-0.603463	-0.782732
	AD-NE	2	2	-0.162179	-0.321554	-0.48249	-0.692685	-0.895078	-0.731005	-0.815
	AD-NE	3	1	-0.0445388	-0.124221	-0.280509	-0.379151	-0.419076	-0.458773	-0.507697
	AD-NE	3	2	-0.168411	-0.352442	-0.433938	-0.521754	-0.539717	-0.600343	-0.656188
	AD-NE	3	3	-0.118634	-0.253128	-0.380677	-0.43663	-0.494132	-0.54588	-0.591152
	AD-NE	4	1	-0.11781	-0.321177	-0.44445	-0.562903	-0.557398	-0.607422	-0.62187
	AD-NE	4	2	-0.0980033	-0.276696	-0.457518	-0.604592	-0.693225	-0.746762	-0.852413
	Group	Mice	Recording	20	50	100	150	200	250	300	(uA)
	WT-NN	1	1	-0.124173	-0.453548	-0.744538	-1.00493	-1.14113	-1.26302	-1.44094
	WT-NN	2	1	-0.0854492	-0.438565	-0.832492	-1.0796	-1.30217	-1.53184	-1.69166
	WT-NN	2	2	-0.128708	-0.36574	-0.600026	-0.746892	-0.763054	-0.763944	-0.931485
	WT-NN	3	1	-0.127651	-0.403224	-0.605396	-0.762649	-0.919131	-1.00151	-1.02799
	WT-NN	4	1	-0.137884	-0.405289	-0.606943	-0.775642	-0.897138	-0.963959	-0.99523
	WT-NN	4	2	-0.0755819	-0.32608	-0.58019	-0.693868	-0.795186	-0.864817	-0.904897
	WT-NN	5	1	-0.0578323	-0.155549	-0.320948	-0.414133	-0.462477	-0.415523	-1.01
	WT-NN	5	2	-0.0711573	-0.204951	-0.339742	-0.446916	-0.5078	-0.566358	-0.614974
	WT-NN	5	3	-0.161532	-0.423741	-0.609203	-0.681297	-0.70547	-0.760764	-0.831045
	WT-NN	6	1	-0.087634	-0.24688	-0.360697	-0.509574	-0.551397	-0.615241	-0.693789
	WT-NN	6	2	-0.175754	-0.445869	-0.63969	-0.820229	-0.938728	-1.13151	-1.21831
	WT-NN	6	3	-0.127203	-0.297859	-0.489252	-0.52844	-0.685987	-0.82016	-0.997197
	WT-NN	7	1	-0.00949063	-0.106778	-0.383079	-0.591907	-0.737016	-0.795033	-0.825853
	WT-NN	7	2	-0.0352797	-0.0986959	-0.18106	-0.19548	-0.212483	-0.232504	-1.01
	Group	Mice	Recording	20	50	100	150	200	250	300	(uA)
	WT-NE	1	1	-0.113207	-0.678692	-1.26671	-1.62121	-2.34393	-2.74543	-2.99645
	WT-NE	1	2	-0.0533482	-0.131686	-0.457735	-0.635226	-0.75269	-0.892265	-1.02602
	WT-NE	2	1	-0.0975745	-0.35162	-0.576169	-0.751959	-0.883893	-0.98144	-1.11448
	WT-NE	3	1	-0.0664451	-0.197532	-0.389931	-0.514637	-0.574008	-0.63213	-1.02
	WT-NE	3	2	-0.0461925	-0.316412	-0.483842	-0.58566	-0.697465	-0.712585	-0.772233
	WT-NE	3	3	0.00693581	-0.178528	-0.408242	-0.596064	-0.735335	-0.834101	-0.938416
	WT-NE	4	1	-0.0458092	-0.0868274	-0.24985	-0.369886	-0.488806	-0.623149	-0.657998
	WT-NE	5	1	-0.0784925	-0.183696	-0.253722	-0.343405	-0.45143	-0.458026	-0.558045
	WT-NE	6	1	-0.0798051	-0.191933	-0.299532	-0.428427	-0.490578	-0.575207	-0.623543
	WT-NE	6	2	-0.310892	-0.679811	-0.840609	-1.0226	-1.17527	-1.25909	-1.028
	WT-NE	6	3	-0.129752	-0.373209	-0.659653	-0.905793	-0.987559	-1.00156	-1.00929
	WT-NE	6	4	-0.123174	-0.152913	-0.330953	-0.44666	-0.449712	-0.570224	-0.58834
