# Supplementary material for: Auditory sensory deprivation induced by noise exposure exacerbates cognitive decline in a mouse model of Alzheimer’s disease
Source: eLife. 2021 Oct 26;10:e70908. doi: 10.7554/eLife.70908 (PMC8547960; doi:10.7554/eLife.70908)
Supplement: Figure 6—source data 1. [file elife-70908-fig6-data1.xlsx]

## Sheet: CA1
Group	Mice	Neuron	Dendrite	N of spines/1 um
WT-NN	1	1	apical	1.51571
WT-NN	1	2	apical	1.43023
WT-NN	1	3	apical	1.28571
WT-NN	1	4	apical	1.77951
WT-NN	1	5	apical	1.43091
WT-NN	1	6	apical	1.36842
WT-NN	1	7	apical	1.59836
WT-NN	1	8	apical	1.58654
WT-NN	1	9	apical	1.69884
WT-NN	1	10	apical	1.26883
WT-NN	2	1	apical	1.24905
WT-NN	2	2	apical	1.63934
WT-NN	2	3	apical	1.37831
WT-NN	2	4	apical	1.20858
WT-NN	2	5	apical	1.54321
WT-NN	2	6	apical	1.38143
WT-NN	2	7	apical	1.63673
WT-NN	2	8	apical	1.31894
WT-NN	2	9	apical	1.35674
WT-NN	2	10	apical	1.66865
WT-NN	2	11	apical	1.43655
WT-NN	3	1	apical	1.50973
WT-NN	3	2	apical	1.71725
WT-NN	3	3	apical	2.28091
WT-NN	3	4	apical	1.75719
WT-NN	3	5	apical	1.91693
WT-NN	3	6	apical	2.09312
WT-NN	3	7	apical	1.61496
WT-NN	3	8	apical	1.7134
WT-NN	3	9	apical	1.99147
WT-NN	3	10	apical	1.69014
WT-NN	4	1	apical	1.9103
WT-NN	4	2	apical	2.58732
WT-NN	4	3	apical	1.57009
WT-NN	4	4	apical	1.93906
WT-NN	4	5	apical	1.08736
WT-NN	4	6	apical	1.33144
WT-NN	4	7	apical	1.41557
WT-NN	4	8	apical	1.11753
WT-NN	4	9	apical	2.10728
WT-NN	4	10	apical	1.60329
WT-NN	1	1	basal	2.06001
WT-NN	1	2	basal	2.38508
WT-NN	1	3	basal	2.30956
WT-NN	1	4	basal	1.89573
WT-NN	1	5	basal	2.04276
WT-NN	1	6	basal	1.94354
WT-NN	2	1	basal	1.78359
WT-NN	2	2	basal	1.75719
WT-NN	2	3	basal	1.21472
WT-NN	2	4	basal	1.19095
WT-NN	2	5	basal	1.75509
WT-NN	2	6	basal	1.52305
WT-NN	2	7	basal	1.39387
WT-NN	2	8	basal	2.34127
WT-NN	3	1	basal	1.91923
WT-NN	3	2	basal	1.74534
WT-NN	3	3	basal	1.51334
WT-NN	3	4	basal	1.92711
WT-NN	3	5	basal	1.79051
WT-NN	3	6	basal	2.25928
WT-NN	3	7	basal	1.79069
WT-NN	3	8	basal	1.81333
WT-NN	4	1	basal	1.70586
WT-NN	4	2	basal	1.62883
WT-NN	4	3	basal	1.82623
WT-NN	4	4	basal	1.34831
WT-NN	4	5	basal	1.94986
WT-NN	4	6	basal	1.83262
WT-NN	4	7	basal	2.10615
WT-NN	4	8	basal	1.22013
WT-NN	4	9	basal	1.09562
Group	Mice	Neuron	Dendrite	N of spines/1 um
WT-NE	1	1	apical	1.94257
WT-NE	1	2	apical	2.24535
WT-NE	1	3	apical	1.94679
WT-NE	1	4	apical	2.21538
WT-NE	1	5	apical	1.74577
WT-NE	1	6	apical	1.9966
WT-NE	2	1	apical	1.50192
WT-NE	2	2	apical	1.77706
WT-NE	2	3	apical	1.35135
WT-NE	2	4	apical	1.43483
WT-NE	2	5	apical	1.16419
WT-NE	2	6	apical	1.31684
WT-NE	2	7	apical	1.74766
WT-NE	2	8	apical	1.60064
WT-NE	3	1	apical	1.20048
WT-NE	3	2	apical	1.36054
WT-NE	3	3	apical	1.48178
WT-NE	3	4	apical	0.793651
WT-NE	3	5	apical	1.68684
WT-NE	3	6	apical	1.71451
WT-NE	3	7	apical	1.45371
WT-NE	3	8	apical	1.2
WT-NE	4	1	apical	1.2453
WT-NE	4	2	apical	1.79146
WT-NE	4	3	apical	1.42857
WT-NE	4	4	apical	1.19312
WT-NE	4	5	apical	1.56803
WT-NE	4	6	apical	1.01296
WT-NE	4	7	apical	1.4268
WT-NE	4	8	apical	1.76298
WT-NE	1	1	basal	1.70976
WT-NE	1	2	basal	2.12766
WT-NE	1	3	basal	1.97076
WT-NE	1	4	basal	1.47256
WT-NE	1	5	basal	1.3805
WT-NE	1	6	basal	1.31291
WT-NE	2	1	basal	1.98188
WT-NE	2	2	basal	1.0551
WT-NE	2	3	basal	1.26632
WT-NE	2	4	basal	1.93125
WT-NE	2	5	basal	1.49314
WT-NE	2	6	basal	1.92837
WT-NE	2	7	basal	1.77563
WT-NE	2	8	basal	1.71588
WT-NE	3	1	basal	1.55502
WT-NE	3	2	basal	1.15538
WT-NE	3	3	basal	1.1209
WT-NE	3	4	basal	1.44928
WT-NE	3	5	basal	1.71794
WT-NE	3	6	basal	1.47941
WT-NE	3	7	basal	1.83658
WT-NE	3	8	basal	2.26263
WT-NE	4	1	basal	1.99452
WT-NE	4	2	basal	1.52349
WT-NE	4	3	basal	1.76141
WT-NE	4	4	basal	1.62996
WT-NE	4	5	basal	1.875
WT-NE	4	6	basal	2.41588
WT-NE	4	7	basal	1.79153
WT-NE	4	8	basal	1.68512
WT-NE	4	9	basal	1.81818
Group	Mice	Neuron	Dendrite	N of spines/1 um
AD-NN	1	1	apical	1.46593
AD-NN	1	2	apical	1.84074
AD-NN	1	3	apical	1.89849
AD-NN	1	4	apical	1.71451
AD-NN	1	5	apical	1.85334
AD-NN	1	6	apical	1.7495
AD-NN	1	7	apical	2.08681
AD-NN	1	8	apical	1.66932
AD-NN	1	9	apical	1.63022
AD-NN	1	10	apical	1.92077
AD-NN	2	1	apical	2.04245
AD-NN	2	2	apical	1.64329
AD-NN	2	3	apical	2.02102
AD-NN	2	4	apical	2.15433
AD-NN	2	5	apical	1.84169
AD-NN	2	6	apical	1.40515
AD-NN	2	7	apical	1.28755
AD-NN	2	8	apical	1.16323
AD-NN	2	9	apical	1.27389
AD-NN	3	1	apical	1.24514
AD-NN	3	2	apical	1.12665
AD-NN	3	3	apical	1.50376
AD-NN	3	4	apical	1.58856
AD-NN	3	5	apical	1.52905
AD-NN	3	6	apical	1.19854
AD-NN	3	7	apical	1.34916
AD-NN	3	8	apical	1.52672
AD-NN	3	9	apical	1.90649
AD-NN	3	10	apical	1.65289
AD-NN	4	1	apical	1.71741
AD-NN	4	2	apical	1.53914
AD-NN	4	3	apical	1.73913
AD-NN	4	4	apical	1.77165
AD-NN	4	5	apical	1.82577
AD-NN	4	6	apical	1.87066
AD-NN	1	1	basal	1.87251
AD-NN	1	2	basal	1.47764
AD-NN	1	3	basal	1.46942
AD-NN	1	4	basal	1.54455
AD-NN	1	5	basal	1.98886
AD-NN	1	6	basal	1.72
AD-NN	1	7	basal	1.66534
AD-NN	1	8	basal	1.71863
AD-NN	1	9	basal	2.09274
AD-NN	1	10	basal	1.71863
AD-NN	2	1	basal	1.67866
AD-NN	2	2	basal	1.57385
AD-NN	2	3	basal	1.71794
AD-NN	2	4	basal	1.32727
AD-NN	2	5	basal	1.3535
AD-NN	2	6	basal	1.32296
AD-NN	2	7	basal	1.71007
AD-NN	2	8	basal	1.65811
AD-NN	2	9	basal	1.32709
AD-NN	3	1	basal	1.56379
AD-NN	3	2	basal	1.30952
AD-NN	3	3	basal	1.59782
AD-NN	3	4	basal	1.95695
AD-NN	3	5	basal	1.94909
AD-NN	3	6	basal	1.40619
AD-NN	3	7	basal	1.72911
AD-NN	3	8	basal	2.04285
AD-NN	3	9	basal	1.66407
AD-NN	3	10	basal	1.41941
AD-NN	4	1	basal	2.49734
AD-NN	4	2	basal	1.38889
AD-NN	4	3	basal	1.12697
AD-NN	4	4	basal	1.3327
AD-NN	4	5	basal	1.46119
AD-NN	4	6	basal	1.2476
AD-NN	4	7	basal	1.89938
AD-NN	4	8	basal	1.73913
Group	Mice	Neuron	Dendrite	N of spines/1 um
AD-NE	1	1	apical	1.27541
AD-NE	1	2	apical	1.07957
AD-NE	1	3	apical	1.48178
AD-NE	1	4	apical	0.873709
AD-NE	1	5	apical	0.719712
AD-NE	1	6	apical	1.18624
AD-NE	1	7	apical	1.35566
AD-NE	1	8	apical	1.25
AD-NE	2	1	apical	1.37525
AD-NE	2	2	apical	1.43713
AD-NE	2	3	apical	1.01351
AD-NE	2	4	apical	1.36025
AD-NE	2	5	apical	1.0224
AD-NE	2	6	apical	1.47929
AD-NE	3	1	apical	1.1811
AD-NE	3	2	apical	1.53846
AD-NE	3	3	apical	1.17048
AD-NE	3	4	apical	1.22013
AD-NE	3	5	apical	1.09562
AD-NE	3	6	apical	1.40406
AD-NE	3	7	apical	1.23223
AD-NE	3	8	apical	1.5399
AD-NE	4	1	apical	1.20077
AD-NE	4	2	apical	1.18802
AD-NE	4	3	apical	1.37999
AD-NE	4	4	apical	1.63148
AD-NE	4	5	apical	1.00592
AD-NE	4	6	apical	0.97493
AD-NE	4	7	apical	1.19284
AD-NE	4	8	apical	1.17488
AD-NE	1	1	basal	1.27796
AD-NE	1	2	basal	1.43713
AD-NE	1	3	basal	1.5507
AD-NE	1	4	basal	1.28154
AD-NE	1	5	basal	1.63673
AD-NE	1	6	basal	1.54912
AD-NE	1	7	basal	1.31789
AD-NE	1	8	basal	0.990884
AD-NE	2	1	basal	1.13982
AD-NE	2	2	basal	1.15446
AD-NE	2	3	basal	1.2474
AD-NE	2	4	basal	1.28577
AD-NE	2	5	basal	2.17895
AD-NE	2	6	basal	1.35575
AD-NE	2	7	basal	1.25406
AD-NE	2	8	basal	1.3766
AD-NE	3	1	basal	1.01812
AD-NE	3	2	basal	1.14504
AD-NE	3	3	basal	1.21852
AD-NE	3	4	basal	1.09923
AD-NE	3	5	basal	1.04975
AD-NE	3	6	basal	1.94952
AD-NE	3	7	basal	2.21359
AD-NE	3	8	basal	1.10147
AD-NE	4	1	basal	2.37507
AD-NE	4	2	basal	1.24976
AD-NE	4	3	basal	0.562041
AD-NE	4	4	basal	0.733098
AD-NE	4	5	basal	1.07771
AD-NE	4	6	basal	0.86448
AD-NE	4	7	basal	1.25043
AD-NE	4	8	basal	1.25042
AD-NE	4	9	basal	0.674218
AD-NE	4	10	basal	1.13095

## Sheet: DG
Group	Mice	Neuron	N of spines/1 um
WT-NN	1	1	2.50212
WT-NN	1	2	2.5463
WT-NN	1	3	2.14676
WT-NN	1	4	2.21493
WT-NN	1	5	2.16877
WT-NN	1	6	2.84866
WT-NN	1	7	1.06796
WT-NN	1	8	1.89247
WT-NN	1	9	2.27053
WT-NN	1	10	2.37376
WT-NN	2	1	1.41061
WT-NN	2	2	1.94739
WT-NN	2	3	1.28974
WT-NN	2	4	1.606
WT-NN	2	5	1.30641
WT-NN	2	6	1.76211
WT-NN	2	7	1.34371
WT-NN	2	8	1.98971
WT-NN	2	9	1.38033
WT-NN	2	10	1.31827
WT-NN	2	11	1.25611
WT-NN	2	12	1.1745
WT-NN	3	1	2.8125
WT-NN	3	2	2.87671
WT-NN	3	3	1.83976
WT-NN	3	4	1.23762
WT-NN	3	5	1.7325
WT-NN	3	6	1.57618
WT-NN	3	7	2.7933
WT-NN	3	8	1.74782
WT-NN	3	9	1.57052
WT-NN	3	10	1.91793
WT-NN	4	1	1.64654
WT-NN	4	2	1.50517
WT-NN	4	3	1.49721
WT-NN	4	4	1.81143
WT-NN	4	5	2.45167
WT-NN	4	6	1.60446
WT-NN	4	7	2.21214
WT-NN	4	8	2.08593
WT-NN	4	9	1.69492
WT-NN	4	10	1.87056
WT-NN	4	11	1.42907
WT-NN	4	12	1.5861
Group	Mice	Neuron	N of spines/1 um
WT-NE	1	1	1.48515
WT-NE	1	2	2.07087
WT-NE	1	3	2.19412
WT-NE	1	4	2.05203
WT-NE	1	5	2.14371
WT-NE	1	6	1.46699
WT-NE	2	1	1.79867
WT-NE	2	2	2.7912
WT-NE	2	3	2.49593
WT-NE	2	4	2.30741
WT-NE	2	5	1.2474
WT-NE	2	6	1.28577
WT-NE	2	7	2.47895
WT-NE	2	8	1.35575
WT-NE	2	9	1.25406
WT-NE	2	10	2.35988
WT-NE	2	11	0.651598
WT-NE	2	12	2.78081
WT-NE	3	1	1.6247
WT-NE	3	2	1.39632
WT-NE	3	3	2.41899
WT-NE	3	4	2.94952
WT-NE	3	5	2.21359
WT-NE	3	6	1.76903
WT-NE	3	7	2.87507
WT-NE	3	8	1.24592
WT-NE	3	9	1.40007
WT-NE	3	10	1.23409
WT-NE	4	1	1.44377
WT-NE	4	2	1.17686
WT-NE	4	3	1.28446
WT-NE	4	4	1.6712
WT-NE	4	5	2.06517
WT-NE	4	6	2.30303
WT-NE	4	7	2.95567
WT-NE	4	8	2.07877
Group	Mice	Neuron	N of spines/1 um
AD-NN	1	1	2.15741
AD-NN	1	2	1.47059
AD-NN	1	3	1.56062
AD-NN	1	4	1.7111
AD-NN	1	5	1.35135
AD-NN	1	6	2.38379
AD-NN	1	7	1.98649
AD-NN	2	1	1.72
AD-NN	2	2	1.09418
AD-NN	2	3	1.99141
AD-NN	2	4	2.2
AD-NN	2	5	2.07834
AD-NN	2	6	2.29239
AD-NN	3	1	2.63578
AD-NN	3	2	2.07502
AD-NN	3	3	1.4046
AD-NN	3	4	2.05479
AD-NN	3	5	1.8334
AD-NN	3	6	1.81959
AD-NN	3	7	1.35566
AD-NN	3	8	2.14116
AD-NN	3	9	1.8283
AD-NN	4	1	1.73554
AD-NN	4	2	1.74308
AD-NN	4	3	2.13261
AD-NN	4	4	1.93839
AD-NN	4	5	1.78236
AD-NN	4	6	1.41693
AD-NN	4	7	1.13792
AD-NN	4	8	1.3748
AD-NN	4	9	1.71395
Group	Mice	Neuron	N of spines/1 um
AD-NE	1	1	1.62542
AD-NE	1	2	1.79616
AD-NE	1	3	1.25885
AD-NE	1	4	1.34959
AD-NE	1	5	1.43141
AD-NE	1	6	1.70828
AD-NE	1	7	1.36006
AD-NE	1	8	1.68729
AD-NE	1	9	2.22222
AD-NE	1	10	1.7425
AD-NE	2	1	1.53126
AD-NE	2	2	1.69851
AD-NE	2	3	1.53389
AD-NE	2	4	1.67742
AD-NE	2	5	1.59251
AD-NE	2	6	1.42914
AD-NE	2	7	1.09801
AD-NE	2	8	1.38889
AD-NE	3	1	1.56924
AD-NE	3	2	2.32288
AD-NE	3	3	1.61943
AD-NE	3	4	1.25
AD-NE	3	5	1.56803
AD-NE	3	6	1.58974
AD-NE	3	7	1.7644
AD-NE	3	8	1.85456
AD-NE	3	9	1.20042
AD-NE	4	1	1.46341
AD-NE	4	2	1.19826
AD-NE	4	3	0.997151
AD-NE	4	4	1.23609
AD-NE	4	5	1.83575
AD-NE	4	6	1.19674
AD-NE	4	7	1.22971
