# Supplementary material for: Auditory sensory deprivation induced by noise exposure exacerbates cognitive decline in a mouse model of Alzheimer’s disease
Source: eLife. 2021 Oct 26;10:e70908. doi: 10.7554/eLife.70908 (PMC8547960; doi:10.7554/eLife.70908)
Supplement: Figure 7—source data 1. [file elife-70908-fig7-data1.xlsx]

## Sheet: NOR - LTM
	AD-NN					AD-NE						WT-NN					WT-NE
3 months	Mouse	New_obj	Old_obj	Tot	P.I.	Mouse	New_obj	Old_obj	Tot	P.I.		Mouse	New_obj	Old_obj	Tot	P.I.	Mouse	New_obj	Old_obj	Tot	P.I.
	A1	11	7	18	61.1111	B1	8.2	8	16.2	50.6173		C1	15.5	10.4	25.9	59.8456	D1	10.7	8.3	19	56.3158
	A2	24	10	34	70.5882	B2	8.9	6	14.9	59.7315		C2	16.5	11.7	28.2	58.5106	D2	19.6	10.3	29.9	65.5518
	A3	11	8	19	57.8947	B3	6.4	5.8	12.2	52.459		C3	16.1	14.3	30.4	52.9605	D3	13.4	10.5	23.9	56.0669
	A4	6.5	3.5	10	65	B4	7.3	3.8	11.1	65.7658		C4	16.9	16.9	33.8	50	D4	11.9	5.2	17.1	69.5906
	A5	6	4.4	10.4	57.6923	B5	13.9	3	16.9	82.2485		C5	49.3	9.3	58.6	84.1297	D5	18.4	5.1	23.5	78.2979
	A6	8.3	3.6	11.9	69.7479	B6	8	5	13	61.5385		C6	11.9	5.2	17.1	69.5906	D6	6.2	6	12.2	50.8197
	A7	13.7	9.5	23.2	59.0517	B7	7	5	12	58.3333		C7	9.5	7.7	17.2	55.2326	D7	19.7	9.3	29	67.931
	A8	10	6	16	62.5	B8	12	11	23	52.1739		C8	15.1	8.4	23.5	64.2553	D8	13.7	17.3	31	44.1935
	A9	12	9	21	57.1429	B9	11.4	4.9	16.3	69.9387		C9	18.2	9.1	27.3	66.6667	D9	37.3	9.5	46.8	79.7009
																	D10	6.2	4	10.2	60.7843
	Average	11.3889	6.77778	18.1667	62.3032	Average	9.23333	5.83333	15.0667	61.4229		Average	18.7778	10.3333	29.1111	62.3546	Average	15.71	8.55	24.26	62.9253
	STD	5.35571	2.53416	7.54785	5.13193	STD	2.58795	2.39374	3.65308	10.1252		STD	11.7552	3.54154	12.3758	10.3767	STD	9.03259	3.87707	10.7006	11.4836
	n	9	9	9	9	n	9	9	9	9		n	9	9	9	9	n	10	10	10	10
	SEM	1.89353	0.895959	2.66857	1.81441	SEM	0.91498	0.846316	1.29156	3.57981		SEM	4.15609	1.25212	4.37552	3.6687	SEM	3.01086	1.29236	3.56686	3.82785
	AD-NN					AD-NE						WT-NN					WT-NE
6 months	Mouse	New_obj	Old_obj	Tot	P.I.	Mouse	New_obj	Old_obj	Tot	P.I.		Mouse	New_obj	Old_obj	Tot	P.I.	Mouse	New_obj	Old_obj	Tot	P.I.
	A10	10.2	8	18.2	56.044	B10	5.4	8	13.4	40.2985		C10	16.1	10.3	26.4	60.9848	D11	11.3	13.6	24.9	45.3815
	A11	11.9	5	16.9	70.4142	B11	7.3	6	13.3	54.8872		C11	17.2	10.3	27.5	62.5455	D12	25.1	25	50.1	50.0998
	A12	15.2	6	21.2	71.6981	B12	13.8	3	16.8	82.1429		C12	21.8	4.6	26.4	82.5758	D13	13.9	6.2	20.1	69.1542
	A13	8	5	13	61.5385	B13	4.5	5.5	10	45		C13	22.6	8.9	31.5	71.746	D14	22.6	16.4	39	57.9487
	A14	10.7	4.2	14.9	71.8121	B14	4.6	5.4	10	46		C14	23	5.5	28.5	80.7018	D15	17.1	17.3	34.4	49.7093
	A15	13.3	3.4	16.7	79.6407	B15	3.8	7.1	10.9	34.8624		C15	21.5	8.3	29.8	72.1477	D16	22	7.8	29.8	73.8255
	A16	8.3	4	12.3	67.4797	B16	7	4.2	11.2	62.5		C16	22.2	15.6	37.8	58.7302	D17	14.8	13.3	28.1	52.669
	A17	6.3	6	12.3	51.2195	B17	10	8	18	55.5556		C17	5.6	8	13.6	41.1765	D18	10.9	5.7	16.6	65.6627
	A18	12	7	19	63.1579	B18	8	8	16	50		C18	7.3	4.6	11.9	61.3445	D19	12.7	9	21.7	58.5253
	A19	4	8	12	33.3333	B19	7	6.8	13.8	50.7246		C19	7.1	6.4	13.5	52.5926	D20	13.7	6.5	20.2	67.8218
	A20	26.3	17.6	43.9	59.9089	B20	8	8	16	50		C20	19.4	9.8	29.2	66.4384	D21	24.4	9.9	34.3	71.137
	A21	13.5	8	21.5	62.7907	B21	12.4	8	20.4	60.7843		C21	11	1.3	12.3	89.4309	D22	23.1	8.6	31.7	72.8707
	A22	8.4	4	12.4	67.7419	B22	4.8	6.2	11	43.6364		C22	11.1	4	15.1	73.5099	D23	8.3	4.1	12.4	66.9355
	A23	7.1	5.6	12.7	55.9055	B23	3.4	10.2	13.6	25		C23	6.7	4.5	11.2	59.8214	D24	24.8	10	34.8	71.2644
	A24	15.6	3.4	19	82.1053	B24	5.9	6.7	12.6	46.8254							D25	17.7	10.4	28.1	62.9893
						B25	5.8	7.1	12.9	44.9612
						B26	6.4	12	18.4	34.7826
						B27	10	10	20	50
	Average	11.3867	6.34667	17.7333	63.6527	Average	7.11667	7.23333	14.35	48.7756		Average	15.1857	7.29286	22.4786	66.6961	Average	17.4933	10.92	28.4133	62.3997
	STD	5.3055	3.51199	7.98308	11.9992	STD	2.87857	2.15161	3.331	12.44		STD	6.77766	3.62204	9.0458	12.7287	STD	5.7374	5.46655	9.62347	9.38526
	n	15	15	15	15	n	18	18	18	18		n	14	14	14	14	n	15	15	15	15
	SEM	1.41796	0.93862	2.13357	3.20693	SEM	0.698156	0.521841	0.807887	3.01714		SEM	1.87979	1.00457	2.50885	3.53032	SEM	1.53339	1.461	2.57198	2.50832

## Sheet: NOR - STM
	AD-NN					AD-NE						WT-NN					WT-NE
3 months	Mouse	New_obj	Old_obj	Tot	P.I.	Mouse	New_obj	Old_obj	Tot	P.I.		Mouse	New_obj	Old_obj	Tot	P.I.	Mouse	New_obj	Old_obj	Tot	P.I.
	E1	10.4	4.3	14.7	70.7483	F1	13.2	6.8	20	66		G1	11.4	12.3	23.7	48.1013	H1	14.9	16.7	31.6	47.1519
	E2	11.8	10.6	22.4	52.6786	F2	11	9.7	20.7	53.1401		G2	29.9	16.1	46	65	H2	25.8	14.6	40.4	63.8614
	E3	16.3	10.9	27.2	59.9265	F3	15.3	6	21.3	71.831		G3	10.9	6.1	17	64.1176	H3	11	12.5	23.5	46.8085
	E4	14.8	9.1	23.9	61.9247	F4	9.4	4.1	13.5	69.6296		G4	7.7	9	16.7	46.1078	H4	12.2	9	21.2	57.5472
	E5	19.6	6.5	26.1	75.0958	F5	14.3	11.2	25.5	56.0784		G5	10.8	4.7	15.5	69.6774	H5	20.6	8.5	29.1	70.7904
	E6	10.9	6.1	17	64.1176	F6	7.6	3.1	10.7	71.028		G6	19.8	10.3	30.1	65.7807	H6	10	3.9	13.9	71.9424
	E7	13.3	3.2	16.5	80.6061	F7	7.3	4.7	12	60.8333		G7	12.5	3.9	16.4	76.2195	H7	13.8	6.2	20	69
	E8	15.7	10	25.7	61.0895	F8	9.4	9.7	19.1	49.2147		G8	13.8	6.2	20	69	H8	16.8	7.5	24.3	69.1358
												G9	11	5.6	16.6	66.2651	H9	10.8	2.9	13.7	78.8321
												G10	12.4	5.4	17.8	69.6629	H10	11.1	8.3	19.4	57.2165
																	H11	13.9	5.4	19.3	72.0207
	Average	14.1	7.5875	21.6875	65.7734	Average	10.9375	6.9125	17.85	62.2194		Average	14.02	7.96	21.98	63.9932	Average	14.6273	8.68182	23.3091	64.0279
	STD	3.11677	2.96669	4.91454	9.07759	STD	3.03689	2.9787	5.19615	8.70442		STD	6.38223	3.90788	9.55682	9.55007	STD	4.83799	4.34507	7.89309	10.545
	n	8	8	8	8	n	8	8	8	8		n	10	10	10	10	n	11	11	11	11
	SEM	1.17803	1.1213	1.85752	3.43101	SEM	1.14784	1.12584	1.96396	3.28996		SEM	2.12741	1.30263	3.18561	3.18336	SEM	1.52991	1.37403	2.49602	3.33461
	AD-NN					AD-NE						WT-NN					WT-NE
6 months	Mouse	New_obj	Old_obj	Tot	P.I.	Mouse	New_obj	Old_obj	Tot	P.I.		Mouse	New_obj	Old_obj	Tot	P.I.	Mouse	New_obj	Old_obj	Tot	P.I.
	E9	17.6	10.1	27.7	63.5379	F9	4.3	6.9	11.2	38.3929		G11	15	8.5	23.5	63.8298	H12	11.2	5.5	16.7	67.0659
	E10	17.7	13	30.7	57.6547	F10	5.7	4.4	10.1	56.4356		G12	15.5	8.4	23.9	64.8536	H13	26.9	8.1	35	76.8571
	E11	11	7.4	18.4	59.7826	F11	6.3	5.8	12.1	52.0661		G13	30.5	13.8	44.3	68.8488	H14	16.7	4.9	21.6	77.3148
	E12	13.5	3.8	17.3	78.0347	F12	3.5	6.5	10	35		G14	17.7	10.3	28	63.2143	H15	10.5	1.9	12.4	84.6774
	E13	6.9	6	12.9	53.4884	F13	8.4	12	20.4	41.1765		G15	8	3.6	11.6	68.9655	H16	34.1	10.3	44.4	76.8018
	E14	9.5	4.5	14	67.8571	F14	5.3	12.4	17.7	29.9435		G16	21.8	4.4	26.2	83.2061	H17	10.8	10.8	21.6	50
	E15	5.7	4.5	10.2	55.8824	F15	10	12.1	22.1	45.2489		G17	30.8	14.4	45.2	68.1416	H18	20.4	8.2	28.6	71.3287
	E16	29.7	14.1	43.8	67.8082	F16	8.3	11.4	19.7	42.132		G18	28	13.8	41.8	66.9856	H19	17.6	4.8	22.4	78.5714
	E17	12.7	6.9	19.6	64.7959	F17	7.8	11.8	19.6	39.7959		G19	32	10.2	42.2	75.8294	H20	19.1	6.3	25.4	75.1969
	E18	7.6	8.9	16.5	46.0606	F18	8.1	10.5	18.6	43.5484		G20	30.6	7.6	38.2	80.1047	H21	8.6	14.8	23.4	36.7521
	E19	6.8	6	12.8	53.125							G21	7.6	4.5	12.1	62.8099	H22	15.3	7.5	22.8	67.1053
	E20	10.5	5.5	16	65.625							G22	6.6	8	14.6	45.2055	H23	15.2	11.2	26.4	57.5758
	E21	20.9	6.8	27.7	75.4513							G23	11.9	5	16.9	70.4142	H24	7.5	5.3	12.8	58.5938
	E22	13.7	10.6	24.3	56.3786												H25	19.4	5.6	25	77.6
																	H26	10.8	9	19.8	54.5455
	Average	13.1286	7.72143	20.85	61.8202	Average	6.77	9.38	16.15	42.374		Average	19.6923	8.65385	28.3462	67.8776	Average	16.2733	7.61333	23.8867	67.3324
	STD	6.5969	3.19258	9.11649	8.43345	STD	2.07045	3.10262	4.7341	7.7042		STD	9.75845	3.72997	12.6522	9.32785	STD	7.1932	3.25047	8.07844	13.259
	n	14	14	14	14	n	10	10	10	10		n	13	13	13	13	n	15	15	15	15
	SEM	1.82965	0.885463	2.52846	2.33902	SEM	0.690151	1.03421	1.57803	2.56807		SEM	2.81702	1.07675	3.65237	2.69272	SEM	1.92246	0.868723	2.15905	3.5436

## Sheet: Open Field
		Distance Covered (m)								Distance Covered (m)
		AD-NN	AD-NE	WT-NN	WT-NE					AD-NN	AD-NE	WT-NN	WT-NE
3 Months		33.979	40.334	37.16	52.691			6 Months		31.646	21.836	30.03	28.18
		21.743	53.222	62.819	30.554					24.122	14.107	14.43	60.62
		43.744	25.884	32.412	55.718					21.065	10.967	49.19	47.42
		44.705	51.057	36.429	41.945					21.011	34.473	23.88	51.79
		41.36	70.147	44.838	43.734					38.006	50.4	22.95	23.96
		66.851	27.293	29.417	33.977					22.352	14.48	67.07	19.43
		47.458	43.866	41.786	31.863					20.392	13.215	35.48	41.98
		51.394	31.193	39.799	31.106					26.224	18.545	30.32	44.32
		52.153	21.994							14.932	23.352	24.89	48.73
			15.157								12.913	33.23	53.25
	Average	44.8208	38.0147	40.5825	40.1985				Average	24.4167	21.4288	33.147	41.968
	STD	12.5127	16.8696	10.2471	9.97386				STD	6.83318	12.3513	15.0542	13.6422
	n	9	10	8	8				n	9	10	10	10
	SEM	4.42389	5.6232	3.87305	3.76976				SEM	2.41589	4.1171	5.01807	4.54741
