# Supplementary material for: Auditory sensory deprivation induced by noise exposure exacerbates cognitive decline in a mouse model of Alzheimer’s disease
Source: eLife journal article supplement (doi:10.7554/elife.70908), 2021-10-26
Supplement: supp2 [file Figure 8- Source data.docx]

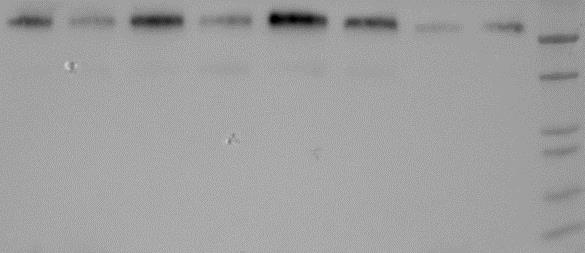
pTauSer396

AD

kDa

WT

NN

NE

NN

NE

10

15

20

25

37

50

AD

WT


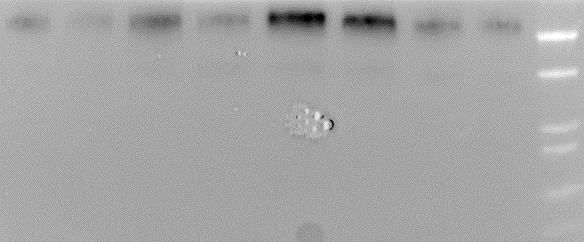


kDa

NN

NE

NN

NE

10

15

20

25

37

50

Tau


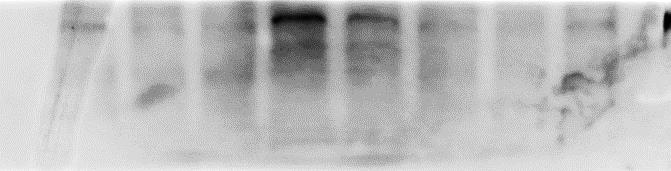
TNF-

AD

kDa

WT

NE

NN

NN

NE

25

20

AD

NN

NE

NN

NE

WT


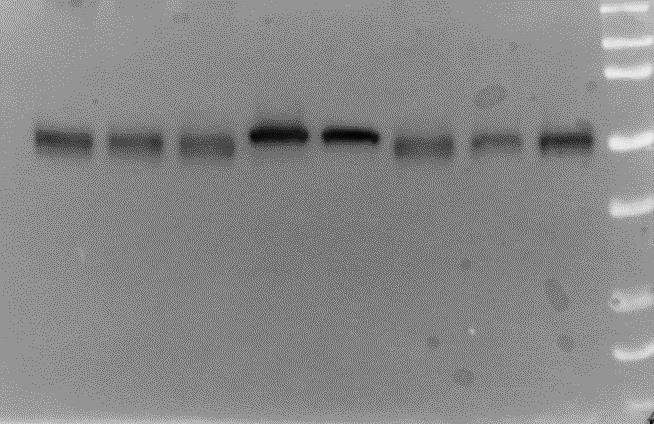


kDa

75

150

100

37

50

-tubulin

15

25

20

Uncropped western blot from Figure 8
