# Supplementary material for: Auditory sensory deprivation induced by noise exposure exacerbates cognitive decline in a mouse model of Alzheimer’s disease
Source: eLife journal article supplement (doi:10.7554/elife.70908), 2021-10-26
Supplement: supp2 [file Figure 10-supplement 1-source data.docx]

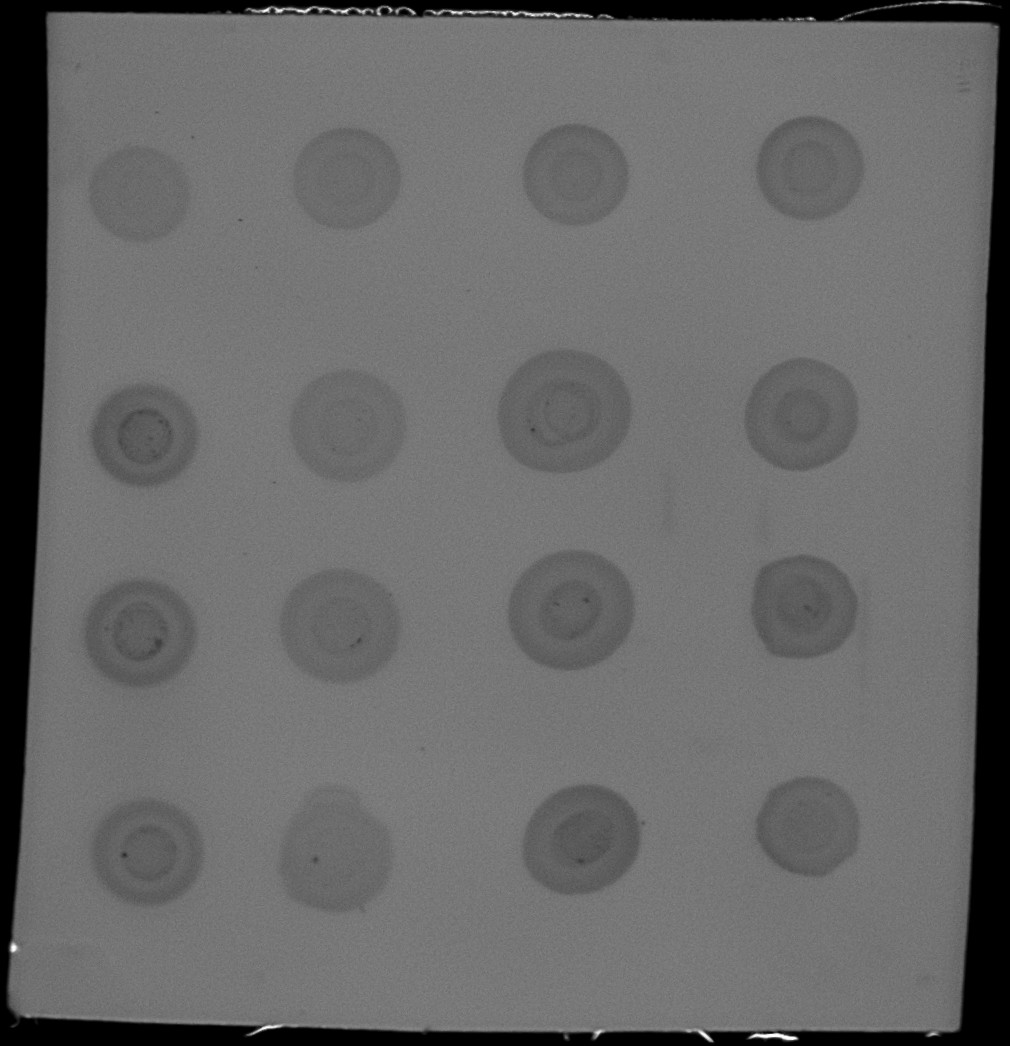


**Ponceau S**

AD

NN

NE


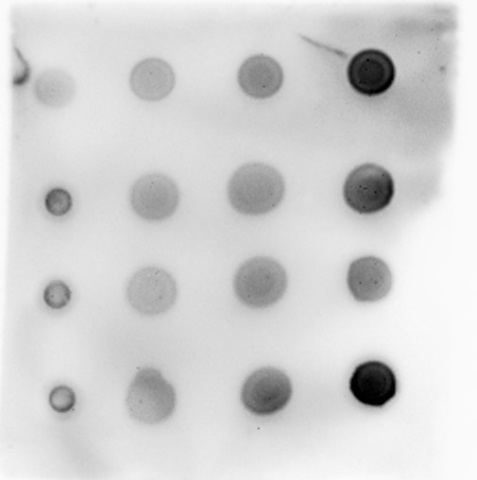


AD

NN

NE

**NT**

**Active-Caspase 3**

AD

NE

NN


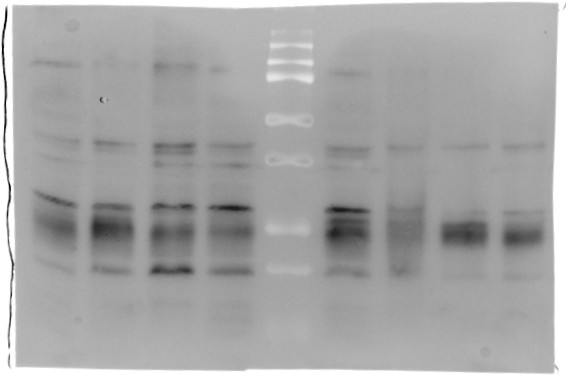


kDa

20

25

37

50

NN

NE

AD


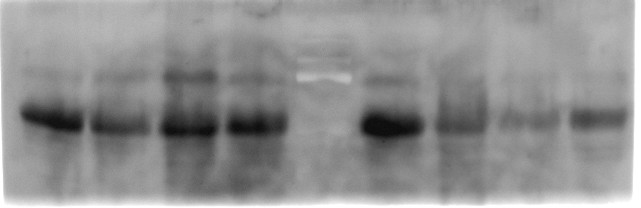


**-Tubulin**

kDa

50

**Bax**

**GAPDH**

AD

NE

NN


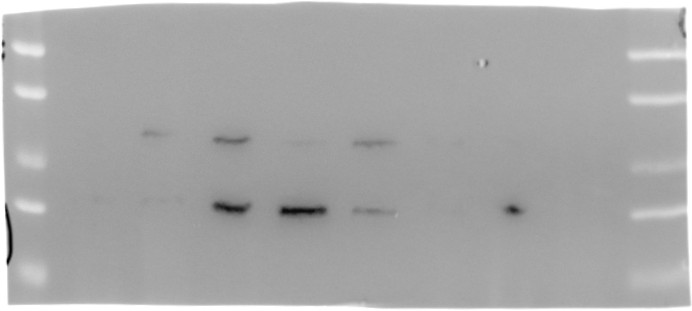


kDa

NN

NE

AD


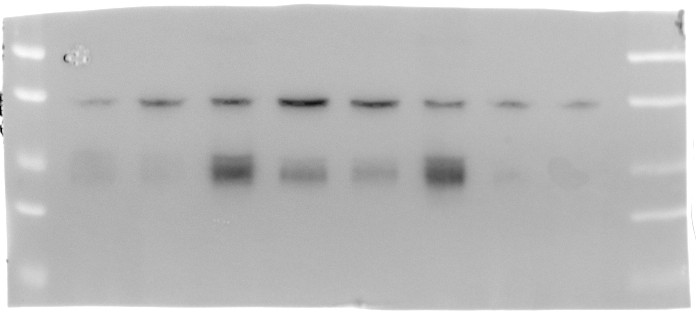


20

37

25

kDa

25

20

37

Uncropped WB from Figure 10-supplement 1
