# Supplementary figures and images for: Auditory sensory deprivation induced by noise exposure exacerbates cognitive decline in a mouse model of Alzheimer’s disease
Source: eLife journal article supplement (doi:10.7554/elife.70908), 2021-10-26

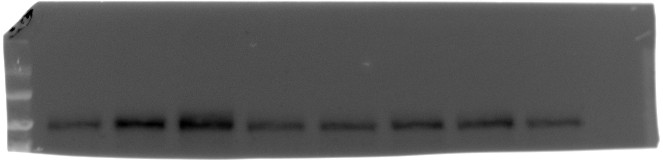


NE

NN

NE

AD

WT

NN

150

100

200

kDa


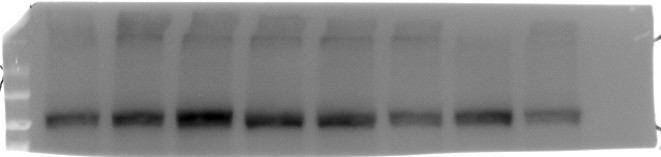


NN

NE

NE

NN

AD

WT

kDa

200

150

100

Uncropped western blot from Figure 3-supplement 2

Supplement: supp2 [file Figure 3-supplement 2-Source data.docx]

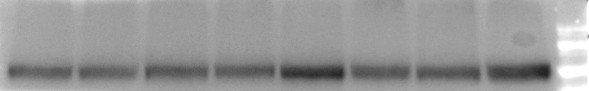

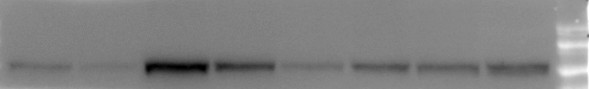


NN

NE

NN

200

150

kDa

100

kDa

200

100

150

NE

NE

AD

WT

NN

WT

AD

NE

NN

Uncropped western blot from Figure 3

Supplement: supp2 [file Figure 3- Source data 2.docx]

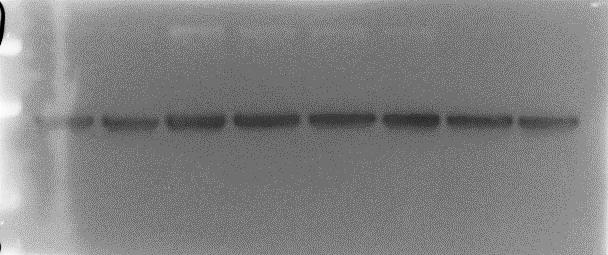

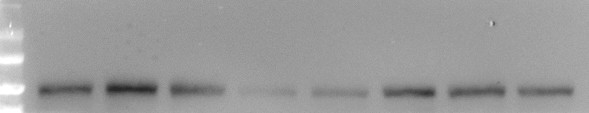


NE

AD

NE

NN

NE

AD

WT

WT

NN

NN

NE

NN

20

25

37

50

75

100

150

200

Uncropped western blot from figure 4

Supplement: supp2 [file Figure 4- Source data 2.docx]

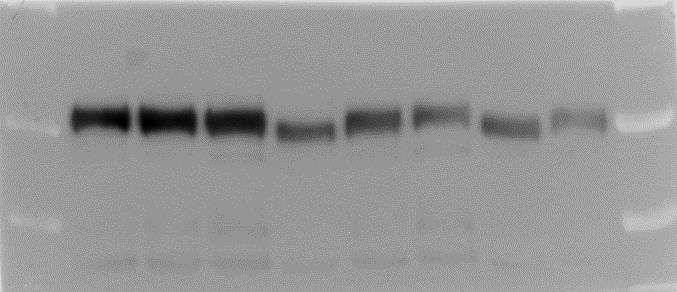

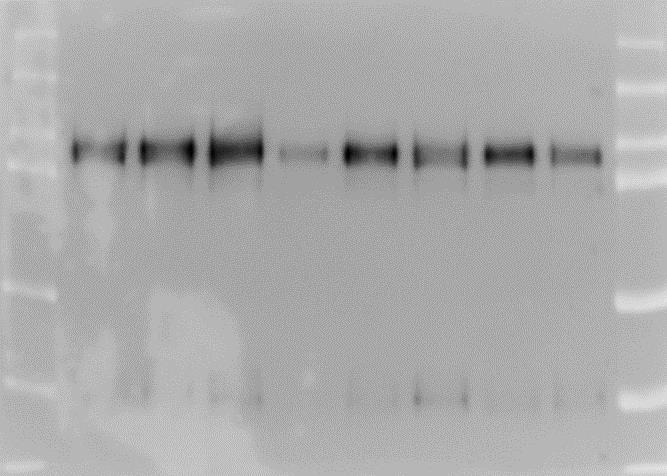


AD

AD

WT

WT

NE

NN

NE

NN

NE

NN

NE

NN

kDa

kDa

25

37

50

75

25

37

50

75

100

150

200

Uncropped WB from Figure 6

Supplement: supp2 [file Figure 6- Source data 2.docx]
